# Supplementary material
Source: PubMed Central journal article supplement (PMC3376215)

# SUPPLEMENTAL INFORMATION

## A Non-Natural Nucleoside with Combined Therapeutic and Diagnostic Activities against Leukemia

Edward A. Motea<sup>a</sup>, Irene Lee<sup>a</sup>, and Anthony J. Berdis<sup>b,#</sup>

Departments of <sup>a</sup>Chemistry and <sup>b</sup>Pharmacology

Case Western Reserve University, 10900 Euclid Avenue, Cleveland, Ohio 44106

***#Corresponding Author Information:*** Telephone (216)-368-4723, Fax (216) 368-3395,

e-mail: [ajb15@cwru.edu](mailto:ajb15@cwru.edu)

**SUPPLEMENTAL FIGURE 1:** Michaelis-Menten plots for the incorporation of dATP and dGTP by terminal deoxynucleotidyl transferase (TdT).

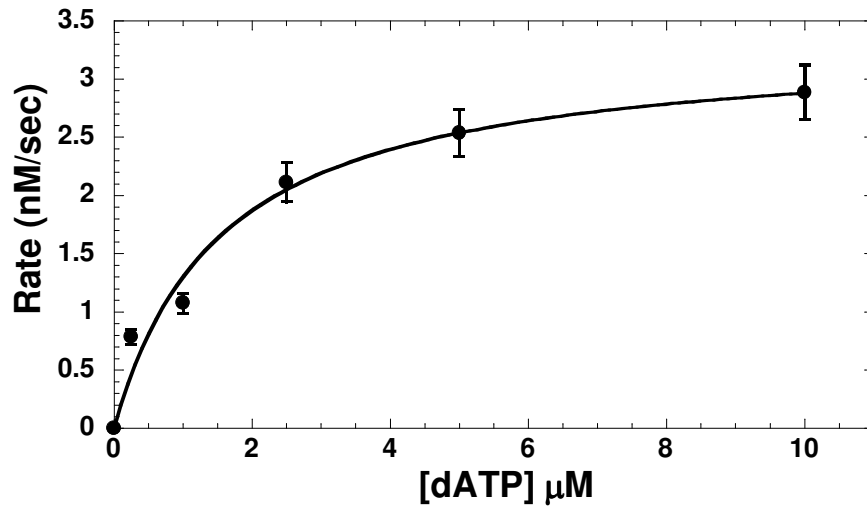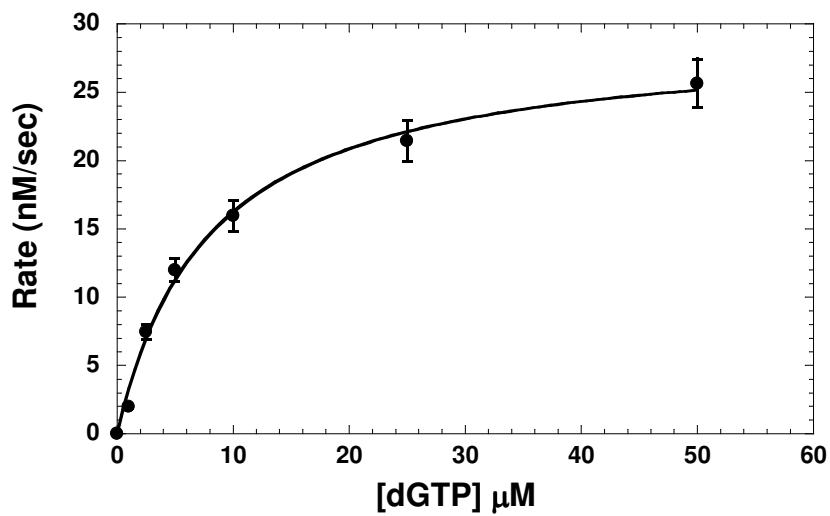

**SUPPLEMENTAL FIGURE 2:** Nucleotide incorporation by terminal deoxynucleotidyl transferase (TdT) up to 20 minutes. Note that 3-Eth-NITP is not elongated beyond  $\text{DNA}_{n+1}$  whereas 5-NITP is extended to obtain products ranging in size from  $\text{DNA}_{n+1}$  to  $\text{DNA}_{n+10}$ .

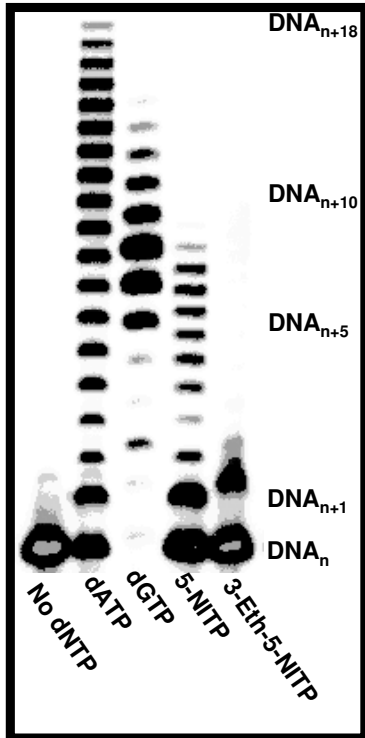

**SUPPLEMENTAL FIGURE 3:** Dose-response curves for the non-natural nucleosides in acute lymphoblastic (ALL) cell lines after treatment with non-natural nucleosides for three days. Dimethyl sulfoxide (DMSO) was used as the vehicle and the highest nucleoside concentration used in each experiment was 100  $\mu\text{g}/\text{mL}$ . GraphPad Prism was used to obtain a (A)  $\text{IC}_{50}$  value of  $14.1 \pm 2.4 \mu\text{g}/\text{mL}$  and (B)  $\text{LD}_{50}$  value of  $27.7 \pm 1.7 \mu\text{g}/\text{mL}$  for 3-Eth-5-NIdR against TdT-positive MOLT4 cells. (C)  $\text{IC}_{50}$  value of  $36.4 \pm 5.8 \mu\text{g}/\text{mL}$  and (D)  $\text{LD}_{50}$  value of approximately 100  $\mu\text{g}/\text{mL}$  were obtained for 5-NIdR against TdT-positive MOLT4 cells.

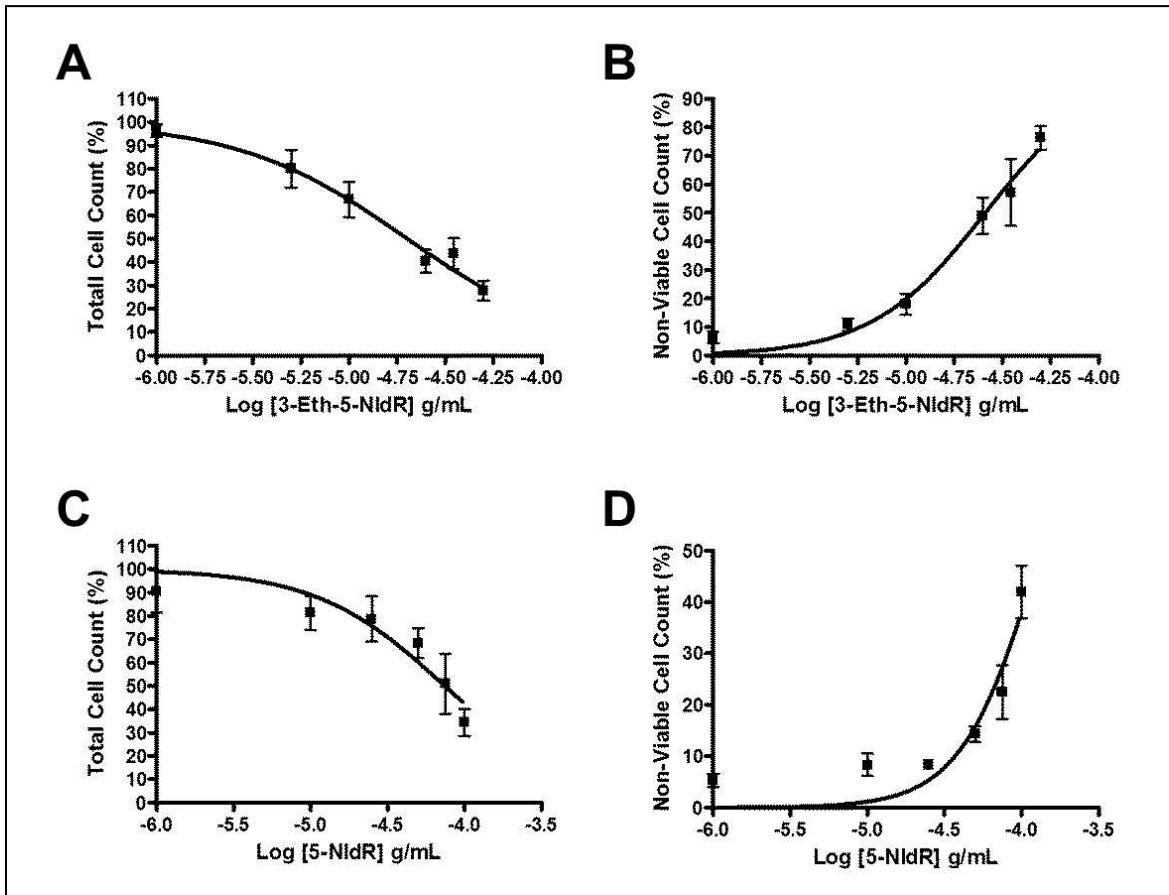

**SUPPLEMENTAL FIGURE 4.** Agarose gel shows DNA laddering as a result of apoptosis in MOLT4 cells treated with non-natural nucleosides. DNA was extracted from MOLT 4 cells treated with (I) DMSO [Vehicle], (II) 100  $\mu\text{g}/\text{mL}$  5-NIdR, (III) 40  $\mu\text{g}/\text{mL}$  3-Eth5-NIdR, and (IV) 100  $\mu\text{g}/\text{mL}$  3-Eth-5-NIdR for 48 h. The 1 Kb DNA Marker was from New England Biolabs, Inc. DNA isolation was performed using the DNeasy® Blood & Tissue kit from QIAGEN.

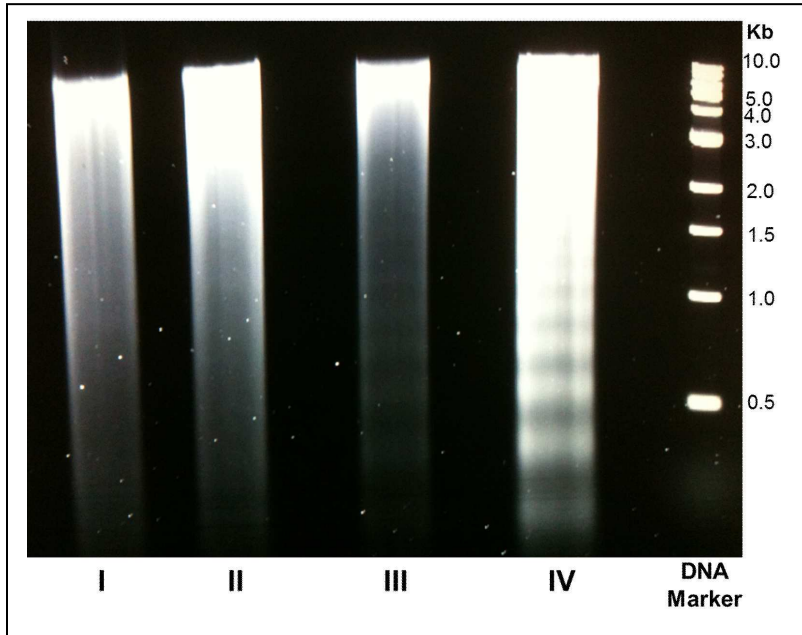

Supplement: NIHMS363874-supplement-1_si_001.pdf [file NIHMS363874-supplement-1_si_001.pdf]
